# Supplementary material
Source: Springer Nature journal article supplement (https://www.springermedizin.de/resource/supplementary/12985_2013_2486_MOESM16_ESM.pdf/9606832)
Supplement: MOESM16 [file 9606832]

| Differentially expressed gene in chronic SIV infection      |                                                                   | Up/down | Brass 2008 | König 2008 | Zhou 2008 | Yeung 2009 | Function                                                                   |
|-------------------------------------------------------------|-------------------------------------------------------------------|---------|------------|------------|-----------|------------|----------------------------------------------------------------------------|
| Gene symbol                                                 | full name                                                         |         |            |            |           |            |                                                                            |
| AP1G2                                                       | Adaptor related protein complex 1, gamma 2 subunit                | ●       |            | ●          |           |            | Vesicular transport                                                        |
| BACE2                                                       | Beta-secretase 2                                                  | ●       |            |            | ●         |            | Cleavage of amyloid precursor protein                                      |
| BLK                                                         | B-lymphoid tyrosine kinase                                        | ●●      |            | ●          |           |            | B-cell development, growth arrest and apoptosis, insulin signaling         |
| CA2                                                         | Carbonic anhydrase II                                             | ●       |            |            | ●         |            | Catalyzes reversible hydration of carbon dioxide                           |
| CD4                                                         | T cell surface glycoprotein CD4                                   | ●●      | ●          |            | ●         |            | HIV attachment, immune signaling                                           |
| C11ORF9                                                     | Chromosome 11 open reading frame 9, myelin gene regulatory factor | ●●      |            | ●          |           |            | Transcription regulator                                                    |
| IL1A                                                        | Interleukin-1 alpha                                               | ●       |            |            | ●         |            | Immune response, inflammation                                              |
| JARID1B                                                     | Jumonji, AT rich interactive domain 1 B (RBP-like), PLU-1         | ●       |            |            |           | ●          | Transcription, H3K4 histon demethylase                                     |
| KHDRBS1                                                     | Sam68, Src-associated substrate in mitosis of 68 kDa              | ●       |            | ●          |           |            | HIV RNA export and translation                                             |
| LAPTM5                                                      | Lysosomal protein transmembrane 5                                 | ●       | ●          |            |           |            | Lysosomal protein                                                          |
| MANBA                                                       | Beta-mannosidase                                                  | ●       |            | ●          |           |            | Metabolism, glycosylation, glycosyl hydrosylase                            |
| NCOA3                                                       | Nuclear receptor coactivator 3                                    | ●       |            |            |           | ●          | Transcriptional co-regulator                                               |
| NCOR2                                                       | Nuclear receptor corepressor 2                                    | ●       | ●          |            |           |            | Transcriptional co-regulator                                               |
| NDUFA10                                                     | NADH dehydrogenase (Ubiquinone) 1 Alpha Subcomplex, 10            | ●       |            |            | ●         |            | Electron transfer in mitochondria                                          |
| PTPRN2                                                      | Protein tyrosine phosphatase receptor pi                          | ●●      |            | ●          |           |            | Cellular signaling, cell growth and differentiation                        |
| ST3GAL5                                                     | Sialyltransferase 9 (SIAT9)                                       | ●       | ●          |            |           |            | HIV attachment, GM3 Synthetase                                             |
| TNFRSF1B                                                    | Tumor necrosis factor receptor superfamily, member 1 B            | ●●      |            |            |           | ●          | Apoptosis                                                                  |
| XPO1                                                        | Exportin 1 (CRM1 Homolog, yeast)                                  | ●       |            |            | ●         |            | RNA export                                                                 |
| <b>Differentially expressed gene in acute SIV infection</b> |                                                                   |         |            |            |           |            |                                                                            |
| ARHGEF12                                                    | Rho guanine nucleotide exchange factor 12                         | ●       | ●          |            |           |            | Cell signaling, G protein coupled receptor-dependent, Rho GTPase-dependent |
| OR2W1                                                       | Olfactory receptor 2W1                                            | ●●      |            |            |           | ●          | Cell signaling, G protein coupled receptor-dependent                       |
| RNF170                                                      | Ring finger protein 170                                           | ●       | ●          |            |           |            | E3 ubiquitin-protein ligase                                                |
